# Supplementary material for: The vaccine-site microenvironment: impacts of antigen, adjuvant, and same-site vaccination on antigen presentation and immune signaling
Source: PubMed Central journal article supplement (PMC8919469; doi:10.1136/jitc-2021-003533), 2022-03-11
Supplement: jitc-2021-003533supp001.pdf [file jitc-2021-003533supp001.pdf]

**The vaccine-site microenvironment: impacts of antigen, adjuvant, and same-site vaccination on antigen presentation and immune signaling****SUPPLEMENTARY MATERIALS**Max O. Meneveau<sup>1</sup>, Pankaj Kumar<sup>2</sup>, Kevin T. Lynch<sup>1</sup>, Sapna P. Patel<sup>3</sup>, Craig L. Slingluff, Jr<sup>1,4</sup><sup>1</sup> Department of Surgery, University of Virginia, Charlottesville, VA, United States<sup>2</sup> Department of Biochemistry and Molecular Genetics, University of Virginia, Charlottesville, VA, United States<sup>3</sup> Department of Melanoma/Medical Oncology, The University of Texas M.D. Anderson Cancer Center, Houston, TX, United States<sup>4</sup> University of Virginia Cancer Center, Charlottesville, VA, United States**SUPPLEMENTARY FIGURES**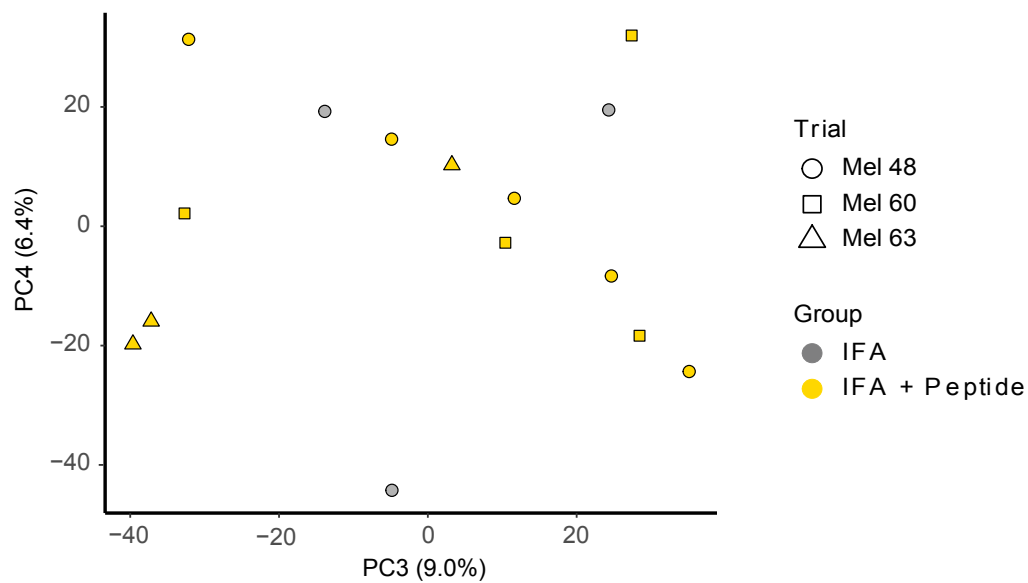

**Supplementary Figure 1.** Principal component analysis demonstrating PC3 and PC4 of the IFA alone and IFA + peptide treated samples. Samples did not group by trial or treatment in the PC3/PC4 domain.

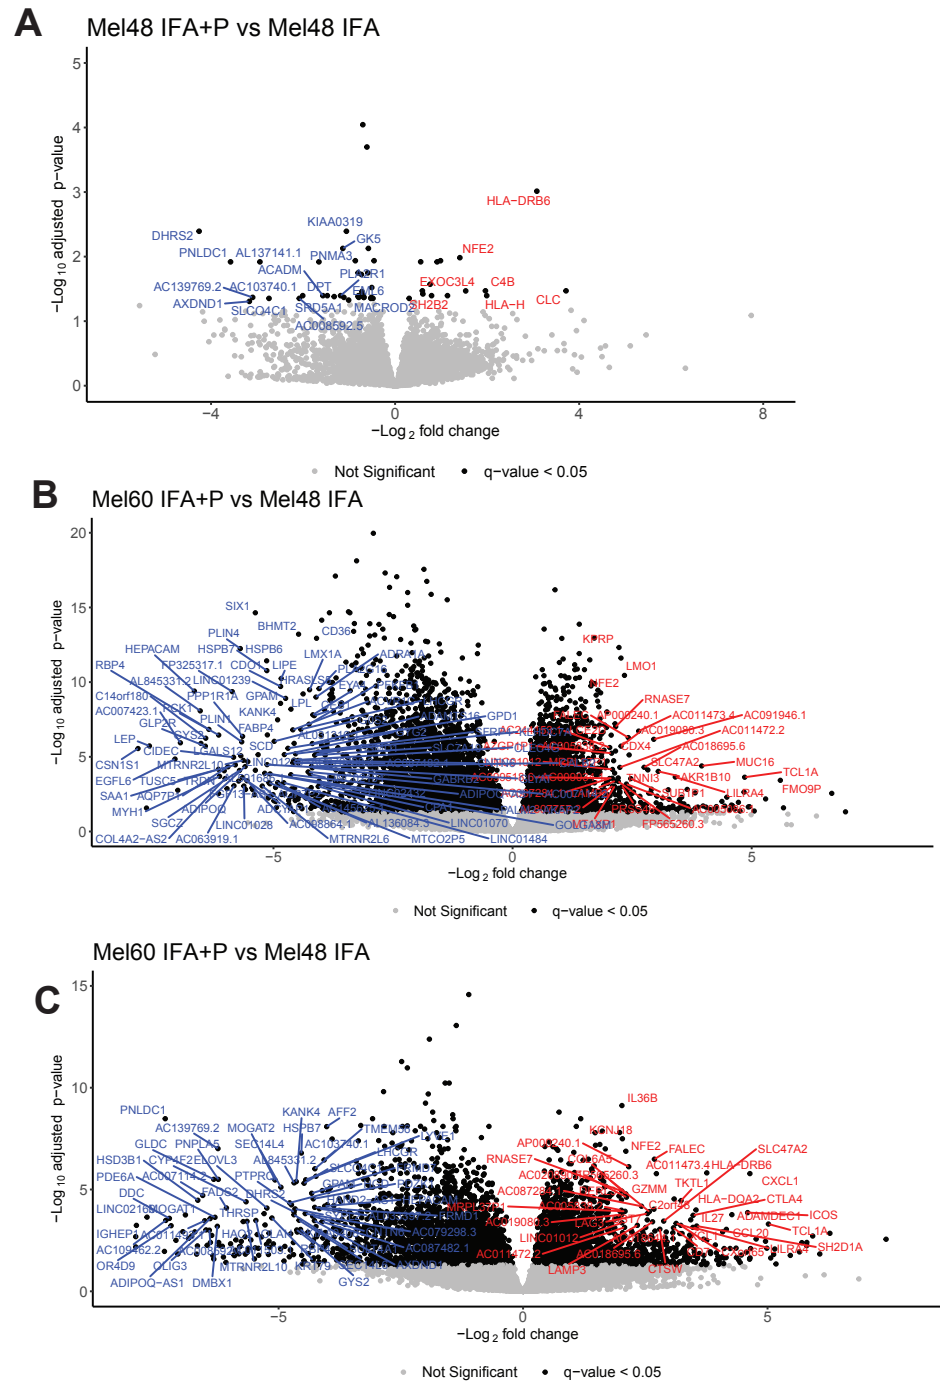

**Supplementary Figure 2.** Volcano plots of differentially expressed genes in the comparisons between samples from participants treated with IFA + Peptide from each clinical trial vs IFA alone from Mel48.

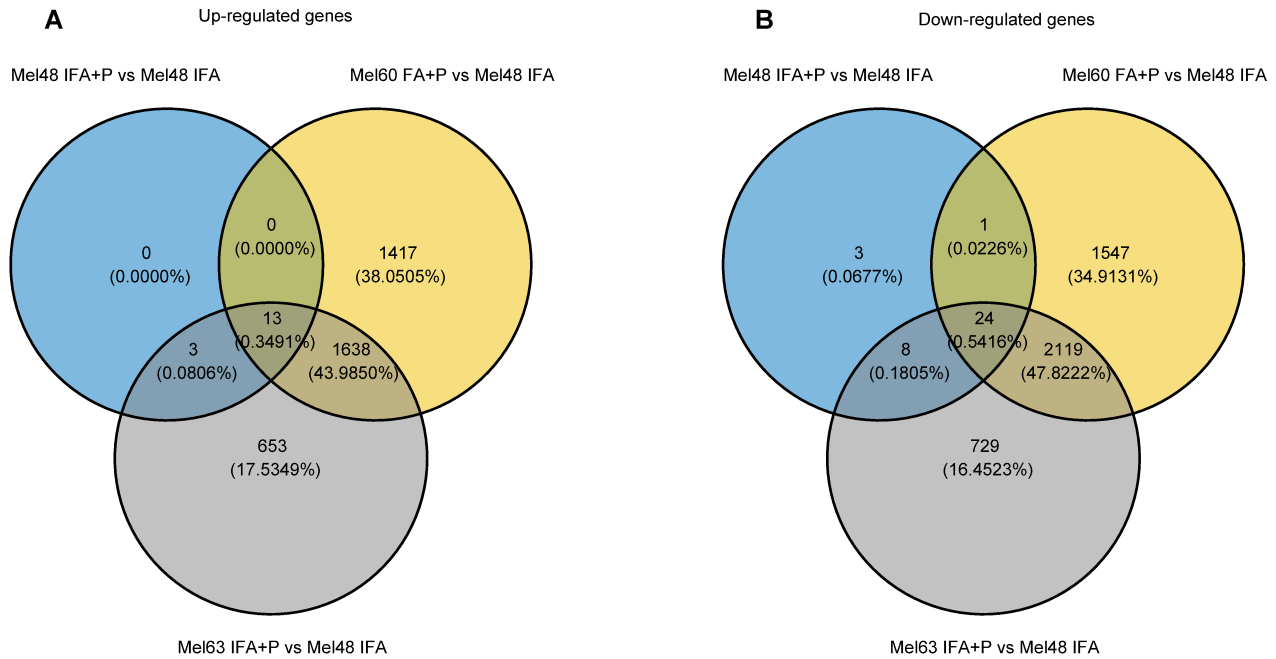

**Supplementary Figure 3.** These venn diagrams demonstrate the overlap in up (**A**) and down (**B**) regulated genes in the comparison of IFA+P vs IFA alone for each trial. IFA + P vs IFA alone samples from participants on Mel48 had relatively few differentially expressed genes compared the comparisons between Mel48 vs IFA+P from Mel63 and Mel64.

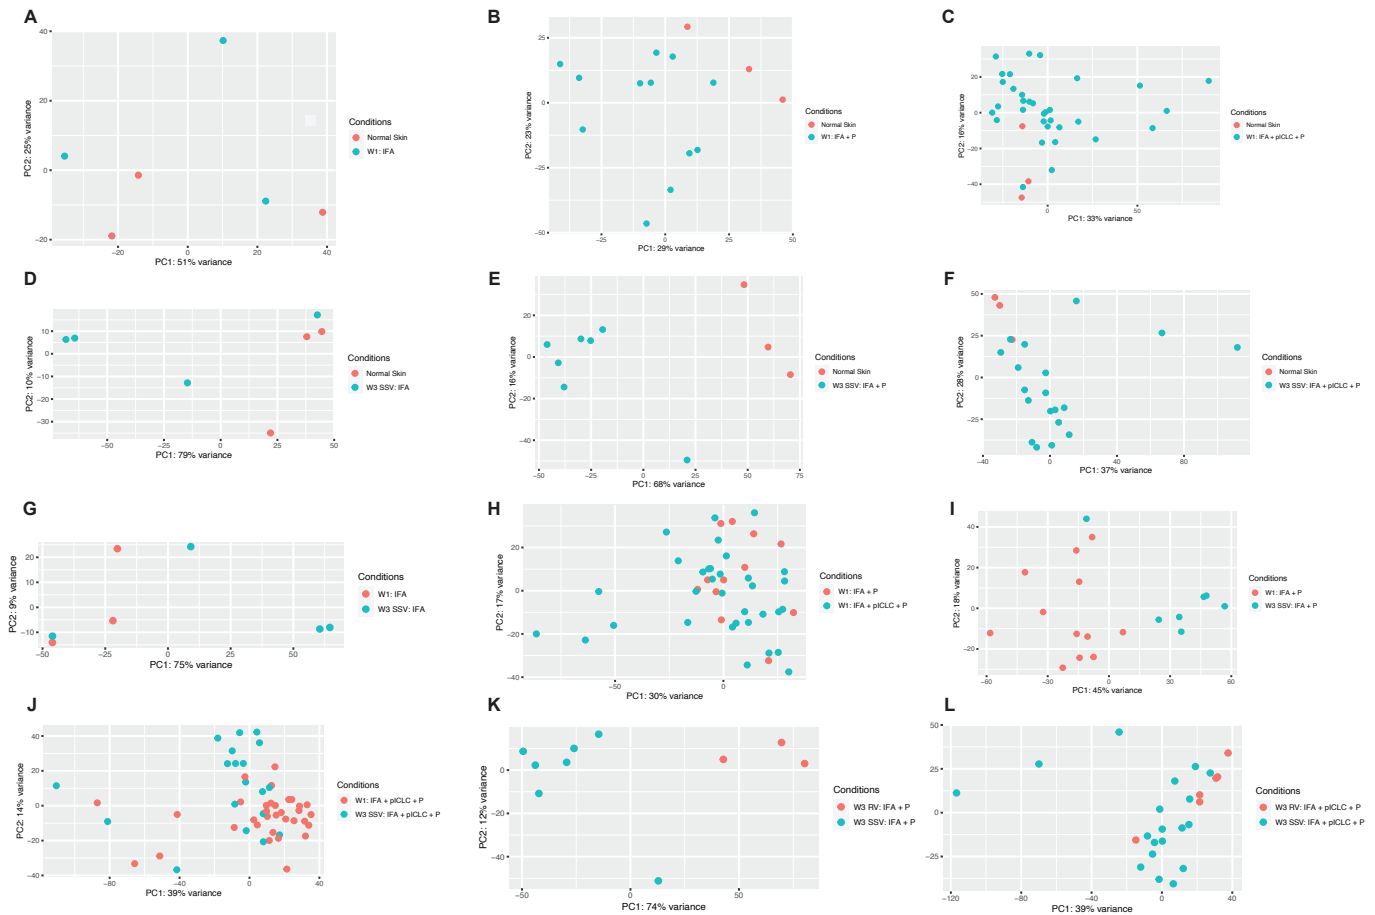

**Supplementary figure 4.** Principal component analysis (PCA) plots of all contrasts presented in figures 4, 5, and 6 of the main manuscript. W1: IFA vs W1: IFA + P PCA is shown in figure 2 of the main manuscript. IFA = Incomplete Freund's Adjuvant, pICLC = poly-ICLC, P = Peptide, PC = Principal Component.

## SUPPLEMENTARY TABLES

**Supplementary Table 1. Top 20 most highly differentially expressed genes in IFA + peptide versus IFA alone**

| Gene Symbol | Gene Name                                                 | log2Fold Change | Raw P-value | FDR-p | Function                                                                       |
|-------------|-----------------------------------------------------------|-----------------|-------------|-------|--------------------------------------------------------------------------------|
| GUCY1B2     | guanylate cyclase 1 soluble subunit beta 2 (pseudogene)   | 4.864           | 0.002       | 0.044 | Signal transduction mediated by Nitric Oxide <sup>13</sup>                     |
| APOBEC3A    | apolipoprotein B mRNA editing enzyme catalytic subunit 3A | 4.504           | 0.001       | 0.028 | Promotes M1 macrophage differentiation, expressed by mature DC's <sup>14</sup> |
| TCL1A       | TCL1 family AKT coactivator A                             | 4.465           | 0.000       | 0.008 | Transcriptional co-regulator with NF- $\kappa$ B <sup>15</sup>                 |

|                   |                                                                                      |        |       |       |                                                                                                                                                                                   |
|-------------------|--------------------------------------------------------------------------------------|--------|-------|-------|-----------------------------------------------------------------------------------------------------------------------------------------------------------------------------------|
| <b>S100A7A</b>    | S100 calcium binding protein A7A                                                     | 4.281  | 0.002 | 0.037 | Antigen processing and presentation, chemoattractant for CD4-T cells <sup>16</sup>                                                                                                |
| <b>SERPINB4</b>   | serpin family B member 4                                                             | 4.241  | 0.003 | 0.046 | DC maturation, protection against killing by CTL, Antigen cross-presentation <sup>17</sup>                                                                                        |
| <b>KIR2DL4</b>    | killer cell immunoglobulin like receptor, two Ig domains and long cytoplasmic tail 4 | 3.726  | 0.002 | 0.039 | Promoter of NK cell immunity, binds peptide-bound HLA-G <sup>18</sup>                                                                                                             |
| <b>CXCL10</b>     | C-X-C motif chemokine ligand 10                                                      | 3.680  | 0.002 | 0.045 | Stimulates chemotaxis, differentiation, and activation of peripheral immune cells, homing receptor ligand for T cells <sup>19</sup>                                               |
| <b>CYP1A1</b>     | cytochrome P450 family 1 subfamily A member 1                                        | 3.610  | 0.001 | 0.025 | Mediates chronic immune response by inhibition of the aryl hydrocarbon receptor (AHR) <sup>20</sup>                                                                               |
| <b>SPIB</b>       | Spi-B transcription factor                                                           | 3.510  | 0.000 | 0.009 | Promotes differentiation into plasmacytoid DC's <sup>21</sup>                                                                                                                     |
| <b>HLA-DPB2</b>   | major histocompatibility complex, class II, DP beta 2 (pseudogene)                   | 3.508  | 0.003 | 0.046 | Function in antigen presentation and immune activation <sup>22</sup>                                                                                                              |
| <b>ICOS</b>       | inducible T cell co-stimulator                                                       | 3.417  | 0.000 | 0.021 | Broad function in the adaptive immune response, including induction, maintenance, and homing of T-follicular helper cells, and stimulation of Th1 and Th2 responses <sup>23</sup> |
| <b>CLC</b>        | Charcot-Leyden crystal galectin                                                      | 3.283  | 0.000 | 0.021 | Maintains function of Treg cells <sup>24</sup>                                                                                                                                    |
| <b>CXCL1</b>      | C-X-C motif chemokine ligand 1                                                       | 3.254  | 0.001 | 0.031 | Chemokine involved in neutrophil recruitment and activation <sup>25</sup>                                                                                                         |
| <b>HLA-DRB6</b>   | major histocompatibility complex, class II, DR beta 6 (pseudogene)                   | 3.068  | 0.000 | 0.001 | Component of the Major Histocompatibility Complex <sup>26</sup>                                                                                                                   |
| <b>HOXD11</b>     | homeobox D11                                                                         | -3.082 | 0.003 | 0.048 | Critical in axial skeletal development and forelimb morphogenesis <sup>27</sup>                                                                                                   |
| <b>PTPRQ</b>      | protein tyrosine phosphatase receptor type Q                                         | -3.259 | 0.000 | 0.009 | phosphatase receptor involved in cellular proliferation and survival <sup>28</sup>                                                                                                |
| <b>AC011503.1</b> |                                                                                      | -3.272 | 0.000 | 0.019 | Uncharacterized protein                                                                                                                                                           |
| <b>KANK4</b>      | KN motif and ankyrin repeat domains 4                                                | -3.333 | 0.000 | 0.013 | Control of cytoskeleton formation <sup>29</sup>                                                                                                                                   |
| <b>FBP2</b>       | fructose-bisphosphatase 2                                                            | -3.755 | 0.000 | 0.019 | Regulator of cellular metabolic functions <sup>30</sup>                                                                                                                           |
| <b>C1orf158</b>   | chromosome 1 open reading frame 158                                                  | -4.297 | 0.003 | 0.048 | Uncharacterized protein                                                                                                                                                           |

Note: log2Fold change demonstrates the expression of IFA + peptide compared to IFA alone. A positive Log2Fold change denotes higher expression in IFA + peptide compared to IFA alone. Negative Log2Fold change represents lower expression in IFA + peptide compared to IFA alone.

**Supplementary Table 2. GSEA results showing significantly altered KEGG pathways ranked by the normalized enrichment score.**

| Pathway                                           | Gene set size | Enrichment Score | Normalized Enrichment Score | p-Value | FDR-p Value |
|---------------------------------------------------|---------------|------------------|-----------------------------|---------|-------------|
| KEGG_GRAFT_VERSUS_HOST_DISEASE                    | 37            | 0.783            | 2.553                       | 0.000   | 0.000       |
| KEGG_ANTIGEN_PROCESSING_AND_PRESENTATION          | 72            | 0.672            | 2.501                       | 0.000   | 0.000       |
| KEGG_CYTOKINE_CYTOKINE_RECEPTOR_INTERACTION       | 254           | 0.553            | 2.485                       | 0.000   | 0.000       |
| KEGG_ALLOGRAFT_REJECTION                          | 35            | 0.765            | 2.464                       | 0.000   | 0.000       |
| KEGG_NATURAL_KILLER_CELL_MEDIATED_CYTOTOXICITY    | 124           | 0.602            | 2.443                       | 0.000   | 0.000       |
| KEGG_T_CELL_RECEPTOR_SIGNALING_PATHWAY            | 108           | 0.611            | 2.433                       | 0.000   | 0.000       |
| KEGG_INTESTINAL_IMMUNE_NETWORK_FOR_IGA_PRODUCTION | 46            | 0.695            | 2.387                       | 0.000   | 0.000       |
| KEGG_TYPE_I_DIABETES_MELLITUS                     | 41            | 0.708            | 2.369                       | 0.000   | 0.000       |
| KEGG_CHEMOKINE_SIGNALING_PATHWAY                  | 187           | 0.543            | 2.354                       | 0.000   | 0.000       |
| KEGG_PRIMARY_IMMUNODEFICIENCY                     | 35            | 0.719            | 2.314                       | 0.000   | 0.000       |
| KEGG_AUTOIMMUNE_THYROID_DISEASE                   | 42            | 0.679            | 2.294                       | 0.000   | 0.000       |
| KEGG_CYTOSOLIC_DNA_SENSING_PATHWAY                | 45            | 0.630            | 2.145                       | 0.000   | 0.000       |
| KEGG_NOD_LIKE_RECEPTOR_SIGNALING_PATHWAY          | 62            | 0.579            | 2.111                       | 0.000   | 0.000       |
| KEGG_LEISHMANIA_INFECTION                         | 70            | 0.550            | 2.039                       | 0.000   | 0.000       |
| KEGG_ASTHMA                                       | 28            | 0.671            | 2.036                       | 0.000   | 0.001       |
| KEGG_TOLL_LIKE_RECEPTOR_SIGNALING_PATHWAY         | 94            | 0.504            | 1.980                       | 0.000   | 0.000       |
| KEGG_SYSTEMIC_LUPUS_ERYTHEMATOSUS                 | 55            | 0.554            | 1.964                       | 0.000   | 0.001       |
| KEGG_HEMATOPOIETIC_CELL_LINEAGE                   | 84            | 0.514            | 1.963                       | 0.000   | 0.000       |
| KEGG_JAK_STAT_SIGNALING_PATHWAY                   | 147           | 0.435            | 1.818                       | 0.000   | 0.000       |
| KEGG_CELL_ADHESION_MOLECULES_CAMS                 | 130           | 0.414            | 1.700                       | 0.000   | 0.002       |
| KEGG_RIG_I_LIKE_RECEPTOR_SIGNALING_PATHWAY        | 62            | 0.462            | 1.685                       | 0.004   | 0.022       |
| KEGG_VIRAL_MYOCARDITIS                            | 68            | 0.427            | 1.574                       | 0.008   | 0.035       |
| KEGG_CELL_CYCLE                                   | 124           | 0.373            | 1.514                       | 0.003   | 0.017       |
| KEGG_VASCULAR_SMOOTH_MUSCLE_CONTRACTION           | 112           | -0.374           | -1.455                      | 0.010   | 0.041       |
| KEGG_STARCH_AND_SUCROSE_METABOLISM                | 48            | -0.454           | -1.523                      | 0.011   | 0.047       |
| KEGG_MELANOMA                                     | 69            | -0.438           | -1.556                      | 0.005   | 0.023       |
| KEGG_DILATED_CARDIOMYOPATHY                       | 89            | -0.430           | -1.612                      | 0.003   | 0.017       |
| KEGG_ADIPOCYTOKINE_SIGNALING_PATHWAY              | 67            | -0.456           | -1.615                      | 0.005   | 0.023       |

|                                                |     |        |        |       |       |
|------------------------------------------------|-----|--------|--------|-------|-------|
| KEGG_CITRATE_CYCLE_TCA_CYCLE                   | 31  | -0.532 | -1.627 | 0.005 | 0.023 |
| KEGG_GLYCEROLIPID_METABOLISM                   | 49  | -0.495 | -1.665 | 0.004 | 0.019 |
| KEGG_FATTY_ACID_METABOLISM                     | 42  | -0.512 | -1.676 | 0.003 | 0.017 |
| KEGG_NEUROACTIVE_LIGAND_RECEPTOR_INTERACTION   | 262 | -0.391 | -1.683 | 0.000 | 0.000 |
| KEGG_PROXIMAL_TUBULE_BICARBONATE_RECLAMATION   | 23  | -0.587 | -1.685 | 0.005 | 0.023 |
| KEGG_ABC_TRANSPORTERS                          | 44  | -0.512 | -1.688 | 0.002 | 0.014 |
| KEGG_INSULIN_SIGNALING_PATHWAY                 | 136 | -0.426 | -1.700 | 0.000 | 0.001 |
| KEGG_BUTANOATE_METABOLISM                      | 34  | -0.548 | -1.709 | 0.005 | 0.023 |
| KEGG_TERPENOID_BACKBONE_BIOSYNTHESIS           | 15  | -0.667 | -1.709 | 0.006 | 0.025 |
| KEGG_PYRUVATE_METABOLISM                       | 40  | -0.539 | -1.737 | 0.002 | 0.014 |
| KEGG_PROPANOATE_METABOLISM                     | 32  | -0.574 | -1.756 | 0.002 | 0.012 |
| KEGG_VALINE_LEUCINE_AND_Isoleucine_DEGRADATION | 43  | -0.544 | -1.793 | 0.001 | 0.007 |
| KEGG_BETA_ALANINE_METABOLISM                   | 22  | -0.654 | -1.854 | 0.002 | 0.011 |
| KEGG_BIOSYNTHESIS_OF_UNSATURATED_FATTY_ACIDS   | 22  | -0.693 | -1.964 | 0.000 | 0.002 |
| KEGG_PEROXISOME                                | 77  | -0.548 | -1.997 | 0.000 | 0.000 |
| KEGG_PPAR_SIGNALING_PATHWAY                    | 69  | -0.593 | -2.108 | 0.000 | 0.000 |

**Supplementary Table 3. FDR-P values of all comparisons for each gene in figures 4A, 5A, 6A.**

| Gene   | Condition 1             | Condition 2             | FDR-Pvalue  | Significant? |
|--------|-------------------------|-------------------------|-------------|--------------|
| CD80   | Normal Skin             | W1: IFA                 | 1           | ns           |
| CD80   | Normal Skin             | W1: IFA + P             | 0.106535291 | ns           |
| CD80   | Normal Skin             | W1: IFA + piCLC + P     | 0.000768439 | ***          |
| CD80   | Normal Skin             | W3 SSV: IFA             | 0.005815237 | **           |
| CD80   | Normal Skin             | W3 SSV: IFA + P         | 7.38E-05    | ***          |
| CD80   | Normal Skin             | W3 SSV: IFA + piCLC + P | 0.000146149 | ***          |
| CD80   | W1: IFA + P             | W1: IFA                 | 0.231588514 | ns           |
| CD80   | W1: IFA + piCLC + P     | W1: IFA + P             | 0.152111612 | ns           |
| CD80   | W3 SSV: IFA             | W1: IFA                 | 0.04872854  | *            |
| CD80   | W3 SSV: IFA + P         | W1: IFA + P             | 0.010590248 | *            |
| CD80   | W3 SSV: IFA + piCLC + P | W1: IFA + piCLC + P     | 0.619774613 | ns           |
| CD80   | W3 SSV: IFA + P         | W3 SSV: IFA             | 0.941353662 | ns           |
| CD80   | W3 SSV: IFA + piCLC + P | W3 SSV: IFA             | 0.923543359 | ns           |
| CD80   | W3 SSV: IFA + piCLC + P | W3 SSV: IFA + P         | 0.638361098 | ns           |
| CD83   | Normal Skin             | W1: IFA                 | 1           | ns           |
| CD83   | Normal Skin             | W1: IFA + P             | 0.069224833 | ns           |
| CD83   | Normal Skin             | W1: IFA + piCLC + P     | 0.02196281  | *            |
| CD83   | Normal Skin             | W3 SSV: IFA             | 0.001869107 | **           |
| CD83   | Normal Skin             | W3 SSV: IFA + P         | 7.94E-05    | ***          |
| CD83   | Normal Skin             | W3 SSV: IFA + piCLC + P | 0.002446439 | **           |
| CD83   | W1: IFA + P             | W1: IFA                 | 0.244706972 | ns           |
| CD83   | W1: IFA + piCLC + P     | W1: IFA + P             | 0.634647988 | ns           |
| CD83   | W3 SSV: IFA             | W1: IFA                 | 0.042186175 | *            |
| CD83   | W3 SSV: IFA + P         | W1: IFA + P             | 0.078860159 | ns           |
| CD83   | W3 SSV: IFA + piCLC + P | W1: IFA + piCLC + P     | 0.265528929 | ns           |
| CD83   | W3 SSV: IFA + P         | W3 SSV: IFA             | 0.998977672 | ns           |
| CD83   | W3 SSV: IFA + piCLC + P | W3 SSV: IFA             | 0.441049819 | ns           |
| CD83   | W3 SSV: IFA + piCLC + P | W3 SSV: IFA + P         | 0.184551264 | ns           |
| CD86   | Normal Skin             | W1: IFA                 | 1           | ns           |
| CD86   | Normal Skin             | W1: IFA + P             | 0.165205475 | ns           |
| CD86   | Normal Skin             | W1: IFA + piCLC + P     | 0.002950351 | **           |
| CD86   | Normal Skin             | W3 SSV: IFA             | 0.001735111 | ***          |
| CD86   | Normal Skin             | W3 SSV: IFA + P         | 2.45E-05    | ***          |
| CD86   | Normal Skin             | W3 SSV: IFA + piCLC + P | 0.000203032 | ***          |
| CD86   | W1: IFA + P             | W1: IFA                 | 0.550705427 | ns           |
| CD86   | W1: IFA + piCLC + P     | W1: IFA + P             | 0.373532483 | ns           |
| CD86   | W3 SSV: IFA             | W1: IFA                 | 0.062841577 | ns           |
| CD86   | W3 SSV: IFA + P         | W1: IFA + P             | 0.00262272  | **           |
| CD86   | W3 SSV: IFA + piCLC + P | W1: IFA + piCLC + P     | 0.277355555 | ns           |
| CD86   | W3 SSV: IFA + P         | W3 SSV: IFA             | 0.990939698 | ns           |
| CD86   | W3 SSV: IFA + piCLC + P | W3 SSV: IFA             | 0.73645502  | ns           |
| CD86   | W3 SSV: IFA + piCLC + P | W3 SSV: IFA + P         | 0.344927936 | ns           |
| CD40   | Normal Skin             | W1: IFA                 | 1           | ns           |
| CD40   | Normal Skin             | W1: IFA + P             | 0.553507408 | ns           |
| CD40   | Normal Skin             | W1: IFA + piCLC + P     | 0.023166054 | *            |
| CD40   | Normal Skin             | W3 SSV: IFA             | 0.023862372 | *            |
| CD40   | Normal Skin             | W3 SSV: IFA + P         | 5.86E-05    | ***          |
| CD40   | Normal Skin             | W3 SSV: IFA + piCLC + P | 0.00388106  | **           |
| CD40   | W1: IFA + P             | W1: IFA                 | 0.554824574 | ns           |
| CD40   | W1: IFA + piCLC + P     | W1: IFA + P             | 0.116414031 | ns           |
| CD40   | W3 SSV: IFA             | W1: IFA                 | 0.059346237 | ns           |
| CD40   | W3 SSV: IFA + P         | W1: IFA + P             | 3.88E-05    | ***          |
| CD40   | W3 SSV: IFA + piCLC + P | W1: IFA + piCLC + P     | 0.387564291 | ns           |
| CD40   | W3 SSV: IFA + P         | W3 SSV: IFA             | 0.829148924 | ns           |
| CD40   | W3 SSV: IFA + piCLC + P | W3 SSV: IFA             | 0.880313909 | ns           |
| CD40   | W3 SSV: IFA + piCLC + P | W3 SSV: IFA + P         | 0.109091339 | ns           |
| CD40LG | Normal Skin             | W1: IFA                 | 1           | ns           |
| CD40LG | Normal Skin             | W1: IFA + P             | 0.601705564 | ns           |

|        |                         |                         |             |     |
|--------|-------------------------|-------------------------|-------------|-----|
| CD40LG | Normal Skin             | W1: IFA + piCLC + P     | 0.061051892 | ns  |
| CD40LG | Normal Skin             | W3 SSV: IFA             | 0.002193346 | **  |
| CD40LG | Normal Skin             | W3 SSV: IFA + P         | 0.000267538 | *** |
| CD40LG | Normal Skin             | W3 SSV: IFA + piCLC + P | 0.00118399  | **  |
| CD40LG | W1: IFA + P             | W1: IFA                 | 0.267198107 | ns  |
| CD40LG | W1: IFA + piCLC + P     | W1: IFA + P             | 0.229621406 | ns  |
| CD40LG | W3 SSV: IFA             | W1: IFA                 | 0.001158955 | **  |
| CD40LG | W3 SSV: IFA + P         | W1: IFA + P             | 0.000151042 | *** |
| CD40LG | W3 SSV: IFA + piCLC + P | W1: IFA + piCLC + P     | 0.013823312 | *   |
| CD40LG | W3 SSV: IFA + P         | W3 SSV: IFA             | 0.995799259 | ns  |
| CD40LG | W3 SSV: IFA + piCLC + P | W3 SSV: IFA             | 0.577380166 | ns  |
| CD40LG | W3 SSV: IFA + piCLC + P | W3 SSV: IFA + P         | 0.486789341 | ns  |
| BATF3  | Normal Skin             | W1: IFA                 | 1           | ns  |
| BATF3  | Normal Skin             | W1: IFA + P             | 0.234285493 | ns  |
| BATF3  | Normal Skin             | W1: IFA + piCLC + P     | 0.001371035 | **  |
| BATF3  | Normal Skin             | W3 SSV: IFA             | 0.001869107 | **  |
| BATF3  | Normal Skin             | W3 SSV: IFA + P         | 0.000104572 | *** |
| BATF3  | Normal Skin             | W3 SSV: IFA + piCLC + P | 0.000303517 | *** |
| BATF3  | W1: IFA + P             | W1: IFA                 | 0.520880305 | ns  |
| BATF3  | W1: IFA + piCLC + P     | W1: IFA + P             | 0.098248933 | ns  |
| BATF3  | W3 SSV: IFA             | W1: IFA                 | 0.038049266 | *   |
| BATF3  | W3 SSV: IFA + P         | W1: IFA + P             | 0.004230693 | **  |
| BATF3  | W3 SSV: IFA + piCLC + P | W1: IFA + piCLC + P     | 0.656352271 | ns  |
| BATF3  | W3 SSV: IFA + P         | W3 SSV: IFA             | 0.999844543 | ns  |
| BATF3  | W3 SSV: IFA + piCLC + P | W3 SSV: IFA             | 0.726019284 | ns  |
| BATF3  | W3 SSV: IFA + piCLC + P | W3 SSV: IFA + P         | 0.548076044 | ns  |
| CD4    | Normal Skin             | W1: IFA                 | 1           | ns  |
| CD4    | Normal Skin             | W1: IFA + P             | 0.403761152 | ns  |
| CD4    | Normal Skin             | W1: IFA + piCLC + P     | 0.053573387 | ns  |
| CD4    | Normal Skin             | W3 SSV: IFA             | 0.001991315 | **  |
| CD4    | Normal Skin             | W3 SSV: IFA + P         | 8.60E-05    | *** |
| CD4    | Normal Skin             | W3 SSV: IFA + piCLC + P | 0.000796859 | *** |
| CD4    | W1: IFA + P             | W1: IFA                 | 0.633969851 | ns  |
| CD4    | W1: IFA + piCLC + P     | W1: IFA + P             | 0.586632802 | ns  |
| CD4    | W3 SSV: IFA             | W1: IFA                 | 0.02516306  | *   |
| CD4    | W3 SSV: IFA + P         | W1: IFA + P             | 0.000452937 | *** |
| CD4    | W3 SSV: IFA + piCLC + P | W1: IFA + piCLC + P     | 0.011781842 | *   |
| CD4    | W3 SSV: IFA + P         | W3 SSV: IFA             | 0.998977672 | ns  |
| CD4    | W3 SSV: IFA + piCLC + P | W3 SSV: IFA             | 0.604108813 | ns  |
| CD4    | W3 SSV: IFA + piCLC + P | W3 SSV: IFA + P         | 0.349334428 | ns  |
| CD8A   | Normal Skin             | W1: IFA                 | 1           | ns  |
| CD8A   | Normal Skin             | W1: IFA + P             | 0.085492699 | ns  |
| CD8A   | Normal Skin             | W1: IFA + piCLC + P     | 0.000142329 | *** |
| CD8A   | Normal Skin             | W3 SSV: IFA             | 0.006445787 | **  |
| CD8A   | Normal Skin             | W3 SSV: IFA + P         | 2.29E-05    | *** |
| CD8A   | Normal Skin             | W3 SSV: IFA + piCLC + P | 5.73E-07    | *** |
| CD8A   | W1: IFA + P             | W1: IFA                 | 0.175588343 | ns  |
| CD8A   | W1: IFA + piCLC + P     | W1: IFA + P             | 0.1563349   | ns  |
| CD8A   | W3 SSV: IFA             | W1: IFA                 | 0.043452503 | *   |
| CD8A   | W3 SSV: IFA + P         | W1: IFA + P             | 0.012581361 | *   |
| CD8A   | W3 SSV: IFA + piCLC + P | W1: IFA + piCLC + P     | 0.024870915 | *   |
| CD8A   | W3 SSV: IFA + P         | W3 SSV: IFA             | 0.91669961  | ns  |
| CD8A   | W3 SSV: IFA + piCLC + P | W3 SSV: IFA             | 0.448869728 | ns  |
| CD8A   | W3 SSV: IFA + piCLC + P | W3 SSV: IFA + P         | 0.832672283 | ns  |
| IFNG   | Normal Skin             | W1: IFA                 | 1           | ns  |
| IFNG   | Normal Skin             | W1: IFA + P             | 0.277994863 | ns  |
| IFNG   | Normal Skin             | W1: IFA + piCLC + P     | 0.004569814 | **  |
| IFNG   | Normal Skin             | W3 SSV: IFA             | 0.022563359 | *   |
| IFNG   | Normal Skin             | W3 SSV: IFA + P         | 7.86E-05    | *** |
| IFNG   | Normal Skin             | W3 SSV: IFA + piCLC + P | 0.000236121 | *** |
| IFNG   | W1: IFA + P             | W1: IFA                 | 0.244614267 | ns  |
| IFNG   | W1: IFA + piCLC + P     | W1: IFA + P             | 0.051337583 | ns  |
| IFNG   | W3 SSV: IFA             | W1: IFA                 | 0.039430886 | *   |
| IFNG   | W3 SSV: IFA + P         | W1: IFA + P             | 0.000127689 | *** |
| IFNG   | W3 SSV: IFA + piCLC + P | W1: IFA + piCLC + P     | 0.092644244 | ns  |
| IFNG   | W3 SSV: IFA + P         | W3 SSV: IFA             | 0.688519877 | ns  |
| IFNG   | W3 SSV: IFA + piCLC + P | W3 SSV: IFA             | 0.616748064 | ns  |
| IFNG   | W3 SSV: IFA + piCLC + P | W3 SSV: IFA + P         | 0.54130969  | ns  |
| TBX21  | Normal Skin             | W1: IFA                 | 1           | ns  |
| TBX21  | Normal Skin             | W1: IFA + P             | 0.301391253 | ns  |
| TBX21  | Normal Skin             | W1: IFA + piCLC + P     | 0.005878372 | **  |
| TBX21  | Normal Skin             | W3 SSV: IFA             | 0.011508377 | *   |
| TBX21  | Normal Skin             | W3 SSV: IFA + P         | 0.000168162 | *** |
| TBX21  | Normal Skin             | W3 SSV: IFA + piCLC + P | 6.13E-05    | *** |
| TBX21  | W1: IFA + P             | W1: IFA                 | 0.183407086 | ns  |
| TBX21  | W1: IFA + piCLC + P     | W1: IFA + P             | 0.194663021 | ns  |
| TBX21  | W3 SSV: IFA             | W1: IFA                 | 0.012836676 | *   |
| TBX21  | W3 SSV: IFA + P         | W1: IFA + P             | 0.003161057 | **  |
| TBX21  | W3 SSV: IFA + piCLC + P | W1: IFA + piCLC + P     | 0.025078223 | *   |
| TBX21  | W3 SSV: IFA + P         | W3 SSV: IFA             | 0.966088604 | ns  |
| TBX21  | W3 SSV: IFA + piCLC + P | W3 SSV: IFA             | 0.810879311 | ns  |
| TBX21  | W3 SSV: IFA + piCLC + P | W3 SSV: IFA + P         | 0.91607758  | ns  |
| STAT1  | Normal Skin             | W1: IFA                 | 1           | ns  |
| STAT1  | Normal Skin             | W1: IFA + P             | 0.142912332 | ns  |

|       |                         |                         |             |     |
|-------|-------------------------|-------------------------|-------------|-----|
| STAT1 | Normal Skin             | W1: IFA + pICLC + P     | 5.99E-05    | *** |
| STAT1 | Normal Skin             | W3 SSV: IFA             | 0.061022511 | ns  |
| STAT1 | Normal Skin             | W3 SSV: IFA + P         | 2.51E-05    | *** |
| STAT1 | Normal Skin             | W3 SSV: IFA + pICLC + P | 7.52E-07    | *** |
| STAT1 | W1: IFA + P             | W1: IFA                 | 0.520053952 | ns  |
| STAT1 | W1: IFA + pICLC + P     | W1: IFA + P             | 0.029554687 | *   |
| STAT1 | W3 SSV: IFA             | W1: IFA                 | 0.450489753 | ns  |
| STAT1 | W3 SSV: IFA + P         | W1: IFA + P             | 0.004498665 | **  |
| STAT1 | W3 SSV: IFA + pICLC + P | W1: IFA + pICLC + P     | 0.096645573 | ns  |
| STAT1 | W3 SSV: IFA + P         | W3 SSV: IFA             | 0.527496179 | ns  |
| STAT1 | W3 SSV: IFA + pICLC + P | W3 SSV: IFA             | 0.109138181 | ns  |
| STAT1 | W3 SSV: IFA + pICLC + P | W3 SSV: IFA + P         | 0.869270626 | ns  |
| GATA3 | Normal Skin             | W1: IFA                 | 1           | ns  |
| GATA3 | Normal Skin             | W1: IFA + P             | 0.73909022  | ns  |
| GATA3 | Normal Skin             | W1: IFA + pICLC + P     | 0.479410923 | ns  |
| GATA3 | Normal Skin             | W3 SSV: IFA             | 0.586325493 | ns  |
| GATA3 | Normal Skin             | W3 SSV: IFA + P         | 0.803762557 | ns  |
| GATA3 | Normal Skin             | W3 SSV: IFA + pICLC + P | 0.975572992 | ns  |
| GATA3 | W1: IFA + P             | W1: IFA                 | 0.405204242 | ns  |
| GATA3 | W1: IFA + pICLC + P     | W1: IFA + P             | 0.936887135 | ns  |
| GATA3 | W3 SSV: IFA             | W1: IFA                 | 0.80946911  | ns  |
| GATA3 | W3 SSV: IFA + P         | W1: IFA + P             | 0.107568945 | ns  |
| GATA3 | W3 SSV: IFA + pICLC + P | W1: IFA + pICLC + P     | 0.028424853 | *   |
| GATA3 | W3 SSV: IFA + P         | W3 SSV: IFA             | 0.955093581 | ns  |
| GATA3 | W3 SSV: IFA + pICLC + P | W3 SSV: IFA             | 0.5337106   | ns  |
| GATA3 | W3 SSV: IFA + pICLC + P | W3 SSV: IFA + P         | 0.795269195 | ns  |
| RORC  | Normal Skin             | W1: IFA                 | 1           | ns  |
| RORC  | Normal Skin             | W1: IFA + P             | 0.992513356 | ns  |
| RORC  | Normal Skin             | W1: IFA + pICLC + P     | 0.96632296  | ns  |
| RORC  | Normal Skin             | W3 SSV: IFA             | 0.208635568 | ns  |
| RORC  | Normal Skin             | W3 SSV: IFA + P         | 0.049876996 | *   |
| RORC  | Normal Skin             | W3 SSV: IFA + pICLC + P | 0.272221073 | ns  |
| RORC  | W1: IFA + P             | W1: IFA                 | 0.886731047 | ns  |
| RORC  | W1: IFA + pICLC + P     | W1: IFA + P             | 0.976221081 | ns  |
| RORC  | W3 SSV: IFA             | W1: IFA                 | 0.302736994 | ns  |
| RORC  | W3 SSV: IFA + P         | W1: IFA + P             | 0.002153749 | **  |
| RORC  | W3 SSV: IFA + pICLC + P | W1: IFA + pICLC + P     | 0.003955918 | **  |
| RORC  | W3 SSV: IFA + P         | W3 SSV: IFA             | 0.995799259 | ns  |
| RORC  | W3 SSV: IFA + pICLC + P | W3 SSV: IFA             | 0.618677894 | ns  |
| RORC  | W3 SSV: IFA + pICLC + P | W3 SSV: IFA + P         | 0.308574734 | ns  |
| FOXP3 | Normal Skin             | W1: IFA                 | 1           | ns  |
| FOXP3 | Normal Skin             | W1: IFA + P             | 0.684830049 | ns  |
| FOXP3 | Normal Skin             | W1: IFA + pICLC + P     | 0.190435173 | ns  |
| FOXP3 | Normal Skin             | W3 SSV: IFA             | 0.042662165 | *   |
| FOXP3 | Normal Skin             | W3 SSV: IFA + P         | 0.002190521 | **  |
| FOXP3 | Normal Skin             | W3 SSV: IFA + pICLC + P | 0.008059791 | **  |
| FOXP3 | W1: IFA + P             | W1: IFA                 | 0.431026986 | ns  |
| FOXP3 | W1: IFA + pICLC + P     | W1: IFA + P             | 0.512270784 | ns  |
| FOXP3 | W3 SSV: IFA             | W1: IFA                 | 0.031087307 | *   |
| FOXP3 | W3 SSV: IFA + P         | W1: IFA + P             | 0.001293996 | **  |
| FOXP3 | W3 SSV: IFA + pICLC + P | W1: IFA + pICLC + P     | 0.016042083 | *   |
| FOXP3 | W3 SSV: IFA + P         | W3 SSV: IFA             | 0.986607086 | ns  |
| FOXP3 | W3 SSV: IFA + pICLC + P | W3 SSV: IFA             | 0.895664995 | ns  |
| FOXP3 | W3 SSV: IFA + pICLC + P | W3 SSV: IFA + P         | 0.523473556 | ns  |
| PD1   | Normal Skin             | W1: IFA                 | 1           | ns  |
| PD1   | Normal Skin             | W1: IFA + P             | 0.417136626 | ns  |
| PD1   | Normal Skin             | W1: IFA + pICLC + P     | 0.001523664 | **  |
| PD1   | Normal Skin             | W3 SSV: IFA             | 0.007233044 | **  |
| PD1   | Normal Skin             | W3 SSV: IFA + P         | 2.19E-05    | *** |
| PD1   | Normal Skin             | W3 SSV: IFA + pICLC + P | 0.000246404 | *** |
| PD1   | W1: IFA + P             | W1: IFA                 | 0.531791551 | ns  |
| PD1   | W1: IFA + pICLC + P     | W1: IFA + P             | 0.016049108 | *   |
| PD1   | W3 SSV: IFA             | W1: IFA                 | 0.039647902 | *   |
| PD1   | W3 SSV: IFA + P         | W1: IFA + P             | 5.16E-05    | *** |
| PD1   | W3 SSV: IFA + pICLC + P | W1: IFA + pICLC + P     | 0.54790876  | ns  |
| PD1   | W3 SSV: IFA + P         | W3 SSV: IFA             | 0.903688722 | ns  |
| PD1   | W3 SSV: IFA + pICLC + P | W3 SSV: IFA             | 0.970426286 | ns  |
| PD1   | W3 SSV: IFA + pICLC + P | W3 SSV: IFA + P         | 0.29639221  | ns  |
| LAG3  | Normal Skin             | W1: IFA                 | 1           | ns  |
| LAG3  | Normal Skin             | W1: IFA + P             | 0.378958845 | ns  |
| LAG3  | Normal Skin             | W1: IFA + pICLC + P     | 0.001876713 | **  |
| LAG3  | Normal Skin             | W3 SSV: IFA             | 0.045994878 | *   |
| LAG3  | Normal Skin             | W3 SSV: IFA + P         | 0.00016211  | *** |
| LAG3  | Normal Skin             | W3 SSV: IFA + pICLC + P | 2.24E-06    | *** |
| LAG3  | W1: IFA + P             | W1: IFA                 | 0.367307225 | ns  |
| LAG3  | W1: IFA + pICLC + P     | W1: IFA + P             | 0.029297214 | *   |
| LAG3  | W3 SSV: IFA             | W1: IFA                 | 0.088954818 | ns  |
| LAG3  | W3 SSV: IFA + P         | W1: IFA + P             | 0.001244695 | **  |
| LAG3  | W3 SSV: IFA + pICLC + P | W1: IFA + pICLC + P     | 0.002136856 | **  |
| LAG3  | W3 SSV: IFA + P         | W3 SSV: IFA             | 0.821989549 | ns  |
| LAG3  | W3 SSV: IFA + pICLC + P | W3 SSV: IFA             | 0.19003287  | ns  |
| LAG3  | W3 SSV: IFA + pICLC + P | W3 SSV: IFA + P         | 0.630303093 | ns  |
| TIM-3 | Normal Skin             | W1: IFA                 | 1           | ns  |
| TIM-3 | Normal Skin             | W1: IFA + P             | 0.296067639 | ns  |



|        |                         |                         |             |     |
|--------|-------------------------|-------------------------|-------------|-----|
| TIM-3  | Normal Skin             | W1: IFA + pICLC + P     | 0.056983315 | ns  |
| TIM-3  | Normal Skin             | W3 SSV: IFA             | 0.009789901 | **  |
| TIM-3  | Normal Skin             | W3 SSV: IFA + P         | 0.000449181 | *** |
| TIM-3  | Normal Skin             | W3 SSV: IFA + pICLC + P | 0.003616052 | **  |
| TIM-3  | W1: IFA + P             | W1: IFA                 | 0.740817012 | ns  |
| TIM-3  | W1: IFA + pICLC + P     | W1: IFA + P             | 0.870799842 | ns  |
| TIM-3  | W3 SSV: IFA             | W1: IFA                 | 0.180074194 | ns  |
| TIM-3  | W3 SSV: IFA + P         | W1: IFA + P             | 0.011673532 | *   |
| TIM-3  | W3 SSV: IFA + pICLC + P | W1: IFA + pICLC + P     | 0.098021208 | ns  |
| TIM-3  | W3 SSV: IFA + P         | W3 SSV: IFA             | 0.994098514 | ns  |
| TIM-3  | W3 SSV: IFA + pICLC + P | W3 SSV: IFA             | 0.70755146  | ns  |
| TIM-3  | W3 SSV: IFA + pICLC + P | W3 SSV: IFA + P         | 0.377071734 | ns  |
| TICAM1 | Normal Skin             | W1: IFA                 | 1           | ns  |
| TICAM1 | Normal Skin             | W1: IFA + P             | 0.795634732 | ns  |
| TICAM1 | Normal Skin             | W1: IFA + pICLC + P     | 0.058460425 | ns  |
| TICAM1 | Normal Skin             | W3 SSV: IFA             | 0.41854247  | ns  |
| TICAM1 | Normal Skin             | W3 SSV: IFA + P         | 0.033886014 | *   |
| TICAM1 | Normal Skin             | W3 SSV: IFA + pICLC + P | 0.000858657 | *** |
| TICAM1 | W1: IFA + P             | W1: IFA                 | 0.2043692   | ns  |
| TICAM1 | W1: IFA + pICLC + P     | W1: IFA + P             | 0.049792283 | *   |
| TICAM1 | W3 SSV: IFA             | W1: IFA                 | 0.083435612 | ns  |
| TICAM1 | W3 SSV: IFA + P         | W1: IFA + P             | 0.023109022 | *   |
| TICAM1 | W3 SSV: IFA + pICLC + P | W1: IFA + pICLC + P     | 0.010050422 | *   |
| TICAM1 | W3 SSV: IFA + P         | W3 SSV: IFA             | 0.894740887 | ns  |
| TICAM1 | W3 SSV: IFA + pICLC + P | W3 SSV: IFA             | 0.147981415 | ns  |
| TICAM1 | W3 SSV: IFA + pICLC + P | W3 SSV: IFA + P         | 0.381479518 | ns  |
| MYD88  | Normal Skin             | W1: IFA                 | 1           | ns  |
| MYD88  | Normal Skin             | W1: IFA + P             | 0.324666971 | ns  |
| MYD88  | Normal Skin             | W1: IFA + pICLC + P     | 0.004531038 | **  |
| MYD88  | Normal Skin             | W3 SSV: IFA             | 0.042074387 | *   |
| MYD88  | Normal Skin             | W3 SSV: IFA + P         | 0.000379406 | *** |
| MYD88  | Normal Skin             | W3 SSV: IFA + pICLC + P | 9.63E-05    | *** |
| MYD88  | W1: IFA + P             | W1: IFA                 | 0.53622382  | ns  |
| MYD88  | W1: IFA + pICLC + P     | W1: IFA + P             | 0.138386014 | ns  |
| MYD88  | W3 SSV: IFA             | W1: IFA                 | 0.193799974 | ns  |
| MYD88  | W3 SSV: IFA + P         | W1: IFA + P             | 0.00692755  | **  |
| MYD88  | W3 SSV: IFA + pICLC + P | W1: IFA + pICLC + P     | 0.073919006 | ns  |
| MYD88  | W3 SSV: IFA + P         | W3 SSV: IFA             | 0.919814797 | ns  |
| MYD88  | W3 SSV: IFA + pICLC + P | W3 SSV: IFA             | 0.616617969 | ns  |
| MYD88  | W3 SSV: IFA + pICLC + P | W3 SSV: IFA + P         | 0.97826591  | ns  |
| ARG1   | Normal Skin             | W1: IFA                 | 1           | ns  |
| ARG1   | Normal Skin             | W1: IFA + P             | 0.748130031 | ns  |
| ARG1   | Normal Skin             | W1: IFA + pICLC + P     | 0.464873931 | ns  |
| ARG1   | Normal Skin             | W3 SSV: IFA             | 0.763867727 | ns  |
| ARG1   | Normal Skin             | W3 SSV: IFA + P         | 0.589485331 | ns  |
| ARG1   | Normal Skin             | W3 SSV: IFA + pICLC + P | 0.851116364 | ns  |
| ARG1   | W1: IFA + P             | W1: IFA                 | 0.644129972 | ns  |
| ARG1   | W1: IFA + pICLC + P     | W1: IFA + P             | 0.907322252 | ns  |
| ARG1   | W3 SSV: IFA             | W1: IFA                 | 0.764436026 | ns  |
| ARG1   | W3 SSV: IFA + P         | W1: IFA + P             | 0.035345336 | *   |
| ARG1   | W3 SSV: IFA + pICLC + P | W1: IFA + pICLC + P     | 0.006218425 | **  |
| ARG1   | W3 SSV: IFA + P         | W3 SSV: IFA             | 0.997801558 | ns  |
| ARG1   | W3 SSV: IFA + pICLC + P | W3 SSV: IFA             | 0.859927178 | ns  |
| ARG1   | W3 SSV: IFA + pICLC + P | W3 SSV: IFA + P         | 0.689322195 | ns  |

**Supplementary Table 4. FDR-P values of all comparisons for each gene in figure's 4B, 5B, 6B.**

| Gene | Condition 1             | Condition 2            | FDR-Pvalue  | Significant? |
|------|-------------------------|------------------------|-------------|--------------|
| CD80 | Normal Skin             | W1: IFA + P            | 0.106535291 | ns           |
| CD80 | Normal Skin             | W3 SSV: IFA + P        | 7.38E-05    | ***          |
| CD80 | Normal Skin             | W3 RV: IFA + P         | 0.76443872  | ns           |
| CD80 | W3 SSV: IFA + P         | W3 RV: IFA + P         | 0.000223518 | ***          |
| CD80 | W1: IFA + P             | W3 RV: IFA + P         | 0.910136267 | ns           |
| CD80 | Normal Skin             | W3 RV: IFA + pICLC + P | 0.033049609 | *            |
| CD80 | W1: IFA + pICLC + P     | W3 RV: IFA + pICLC + P | 0.910136267 | ns           |
| CD80 | W3 SSV: IFA + pICLC + P | W3 RV: IFA + pICLC + P | 0.288646884 | ns           |
| CD83 | Normal Skin             | W1: IFA + P            | 0.069224833 | ns           |
| CD83 | Normal Skin             | W3 SSV: IFA + P        | 7.94E-05    | ***          |
| CD83 | Normal Skin             | W3 RV: IFA + P         | 0.980134489 | ns           |
| CD83 | W3 SSV: IFA + P         | W3 RV: IFA + P         | 5.02E-05    | ***          |
| CD83 | W1: IFA + P             | W3 RV: IFA + P         | 0.905419821 | ns           |
| CD83 | Normal Skin             | W3 RV: IFA + pICLC + P | 0.27912594  | ns           |
| CD83 | W1: IFA + pICLC + P     | W3 RV: IFA + pICLC + P | 0.905419821 | ns           |
| CD83 | W3 SSV: IFA + pICLC + P | W3 RV: IFA + pICLC + P | 0.147940092 | ns           |
| CD86 | Normal Skin             | W1: IFA + P            | 0.165205475 | ns           |
| CD86 | Normal Skin             | W3 SSV: IFA + P        | 2.45E-05    | ***          |
| CD86 | Normal Skin             | W3 RV: IFA + P         | 0.886201324 | ns           |
| CD86 | W3 SSV: IFA + P         | W3 RV: IFA + P         | 7.24E-05    | ***          |
| CD86 | W1: IFA + P             | W3 RV: IFA + P         | 0.967903317 | ns           |
| CD86 | Normal Skin             | W3 RV: IFA + pICLC + P | 0.056779238 | ns           |
| CD86 | W1: IFA + pICLC + P     | W3 RV: IFA + pICLC + P | 0.967903317 | ns           |

|        |                         |                        |             |     |
|--------|-------------------------|------------------------|-------------|-----|
| CD86   | W3 SSV: IFA + pICLC + P | W3 RV: IFA + pICLC + P | 0.347204194 | ns  |
| CD40   | Normal Skin             | W1: IFA + P            | 0.553507408 | ns  |
| CD40   | Normal Skin             | W3 SSV: IFA + P        | 5.86E-05    | *** |
| CD40   | Normal Skin             | W3 RV: IFA + P         | 0.737557226 | ns  |
| CD40   | W3 SSV: IFA + P         | W3 RV: IFA + P         | 0.000674476 | *** |
| CD40   | W1: IFA + P             | W3 RV: IFA + P         | 0.922238713 | ns  |
| CD40   | Normal Skin             | W3 RV: IFA + pICLC + P | 0.23882714  | ns  |
| CD40   | W1: IFA + pICLC + P     | W3 RV: IFA + pICLC + P | 0.922238713 | ns  |
| CD40   | W3 SSV: IFA + pICLC + P | W3 RV: IFA + pICLC + P | 0.254788139 | ns  |
| CD40LG | Normal Skin             | W1: IFA + P            | 0.601705564 | ns  |
| CD40LG | Normal Skin             | W3 SSV: IFA + P        | 0.000267538 | *** |
| CD40LG | Normal Skin             | W3 RV: IFA + P         | 0.85733342  | ns  |
| CD40LG | W3 SSV: IFA + P         | W3 RV: IFA + P         | 5.42E-05    | *** |
| CD40LG | W1: IFA + P             | W3 RV: IFA + P         | 0.995444309 | ns  |
| CD40LG | Normal Skin             | W3 RV: IFA + pICLC + P | 0.204234182 | ns  |
| CD40LG | W1: IFA + pICLC + P     | W3 RV: IFA + pICLC + P | 0.995444309 | ns  |
| CD40LG | W3 SSV: IFA + pICLC + P | W3 RV: IFA + pICLC + P | 0.149078054 | ns  |
| BATF3  | Normal Skin             | W1: IFA + P            | 0.234285493 | ns  |
| BATF3  | Normal Skin             | W3 SSV: IFA + P        | 0.000104572 | *** |
| BATF3  | Normal Skin             | W3 RV: IFA + P         | 0.825916783 | ns  |
| BATF3  | W3 SSV: IFA + P         | W3 RV: IFA + P         | 0.000486573 | *** |
| BATF3  | W1: IFA + P             | W3 RV: IFA + P         | 0.894014538 | ns  |
| BATF3  | Normal Skin             | W3 RV: IFA + pICLC + P | 0.218123585 | ns  |
| BATF3  | W1: IFA + pICLC + P     | W3 RV: IFA + pICLC + P | 0.894014538 | ns  |
| BATF3  | W3 SSV: IFA + pICLC + P | W3 RV: IFA + pICLC + P | 0.056421643 | ns  |
| CD4    | Normal Skin             | W1: IFA + P            | 0.403761152 | ns  |
| CD4    | Normal Skin             | W3 SSV: IFA + P        | 8.60E-05    | *** |
| CD4    | Normal Skin             | W3 RV: IFA + P         | 0.928266469 | ns  |
| CD4    | W3 SSV: IFA + P         | W3 RV: IFA + P         | 2.98E-05    | *** |
| CD4    | W1: IFA + P             | W3 RV: IFA + P         | 0.984257495 | ns  |
| CD4    | Normal Skin             | W3 RV: IFA + pICLC + P | 0.217666049 | ns  |
| CD4    | W1: IFA + pICLC + P     | W3 RV: IFA + pICLC + P | 0.984257495 | ns  |
| CD4    | W3 SSV: IFA + pICLC + P | W3 RV: IFA + pICLC + P | 0.11482172  | ns  |
| CD8A   | Normal Skin             | W1: IFA + P            | 0.085492699 | ns  |
| CD8A   | Normal Skin             | W3 SSV: IFA + P        | 2.29E-05    | *** |
| CD8A   | Normal Skin             | W3 RV: IFA + P         | 0.720829789 | ns  |
| CD8A   | W3 SSV: IFA + P         | W3 RV: IFA + P         | 0.000299514 | *** |
| CD8A   | W1: IFA + P             | W3 RV: IFA + P         | 0.950732209 | ns  |
| CD8A   | Normal Skin             | W3 RV: IFA + pICLC + P | 0.01537181  | *   |
| CD8A   | W1: IFA + pICLC + P     | W3 RV: IFA + pICLC + P | 0.950732209 | ns  |
| CD8A   | W3 SSV: IFA + pICLC + P | W3 RV: IFA + pICLC + P | 0.090957415 | ns  |
| IFNG   | Normal Skin             | W1: IFA + P            | 0.277994863 | ns  |
| IFNG   | Normal Skin             | W3 SSV: IFA + P        | 7.86E-05    | *** |
| IFNG   | Normal Skin             | W3 RV: IFA + P         | 0.882663938 | ns  |
| IFNG   | W3 SSV: IFA + P         | W3 RV: IFA + P         | 3.79E-05    | *** |
| IFNG   | W1: IFA + P             | W3 RV: IFA + P         | 0.983188954 | ns  |
| IFNG   | Normal Skin             | W3 RV: IFA + pICLC + P | 0.036430218 | *   |
| IFNG   | W1: IFA + pICLC + P     | W3 RV: IFA + pICLC + P | 0.983188954 | ns  |
| IFNG   | W3 SSV: IFA + pICLC + P | W3 RV: IFA + pICLC + P | 0.261670608 | ns  |
| TBX21  | Normal Skin             | W1: IFA + P            | 0.301391253 | ns  |
| TBX21  | Normal Skin             | W3 SSV: IFA + P        | 0.000168162 | *** |
| TBX21  | Normal Skin             | W3 RV: IFA + P         | 0.539257063 | ns  |
| TBX21  | W3 SSV: IFA + P         | W3 RV: IFA + P         | 3.38E-06    | *** |
| TBX21  | W1: IFA + P             | W3 RV: IFA + P         | 0.988235511 | ns  |
| TBX21  | Normal Skin             | W3 RV: IFA + pICLC + P | 0.059377385 | ns  |
| TBX21  | W1: IFA + pICLC + P     | W3 RV: IFA + pICLC + P | 0.988235511 | ns  |
| TBX21  | W3 SSV: IFA + pICLC + P | W3 RV: IFA + pICLC + P | 0.168049843 | ns  |
| STAT1  | Normal Skin             | W1: IFA + P            | 0.142912332 | ns  |
| STAT1  | Normal Skin             | W3 SSV: IFA + P        | 2.51E-05    | *** |
| STAT1  | Normal Skin             | W3 RV: IFA + P         | 0.508457256 | ns  |
| STAT1  | W3 SSV: IFA + P         | W3 RV: IFA + P         | 0.002094592 | **  |
| STAT1  | W1: IFA + P             | W3 RV: IFA + P         | 0.899929076 | ns  |
| STAT1  | Normal Skin             | W3 RV: IFA + pICLC + P | 0.034653928 | *   |
| STAT1  | W1: IFA + pICLC + P     | W3 RV: IFA + pICLC + P | 0.899929076 | ns  |
| STAT1  | W3 SSV: IFA + pICLC + P | W3 RV: IFA + pICLC + P | 0.042864044 | *   |
| GATA3  | Normal Skin             | W1: IFA + P            | 0.73909022  | ns  |
| GATA3  | Normal Skin             | W3 SSV: IFA + P        | 0.803762557 | ns  |
| GATA3  | Normal Skin             | W3 RV: IFA + P         | 0.298683975 | ns  |
| GATA3  | W3 SSV: IFA + P         | W3 RV: IFA + P         | 0.041330023 | *   |
| GATA3  | W1: IFA + P             | W3 RV: IFA + P         | 0.968986563 | ns  |
| GATA3  | Normal Skin             | W3 RV: IFA + pICLC + P | 0.523893247 | ns  |
| GATA3  | W1: IFA + pICLC + P     | W3 RV: IFA + pICLC + P | 0.968986563 | ns  |
| GATA3  | W3 SSV: IFA + pICLC + P | W3 RV: IFA + pICLC + P | 0.12324254  | ns  |
| RORC   | Normal Skin             | W1: IFA + P            | 0.992513356 | ns  |
| RORC   | Normal Skin             | W3 SSV: IFA + P        | 0.049876996 | *   |
| RORC   | Normal Skin             | W3 RV: IFA + P         | 0.801701037 | ns  |
| RORC   | W3 SSV: IFA + P         | W3 RV: IFA + P         | 0.008996416 | **  |
| RORC   | W1: IFA + P             | W3 RV: IFA + P         | 0.982614639 | ns  |
| RORC   | Normal Skin             | W3 RV: IFA + pICLC + P | 0.922562725 | ns  |
| RORC   | W1: IFA + pICLC + P     | W3 RV: IFA + pICLC + P | 0.982614639 | ns  |
| RORC   | W3 SSV: IFA + pICLC + P | W3 RV: IFA + pICLC + P | 0.074897662 | ns  |
| FOXP3  | Normal Skin             | W1: IFA + P            | 0.684830049 | ns  |
| FOXP3  | Normal Skin             | W3 SSV: IFA + P        | 0.002190521 | **  |
| FOXP3  | Normal Skin             | W3 RV: IFA + P         | 0.963330726 | ns  |

|        |                         |                        |             |     |
|--------|-------------------------|------------------------|-------------|-----|
| FOXP3  | W3 SSV: IFA + P         | W3 RV: IFA + P         | 0.002662953 | **  |
| FOXP3  | W1: IFA + P             | W3 RV: IFA + P         | 0.972566004 | ns  |
| FOXP3  | Normal Skin             | W3 RV: IFA + piCLC + P | 0.290594995 | ns  |
| FOXP3  | W1: IFA + piCLC + P     | W3 RV: IFA + piCLC + P | 0.972566004 | ns  |
| FOXP3  | W3 SSV: IFA + piCLC + P | W3 RV: IFA + piCLC + P | 0.290178454 | ns  |
| PD1    | Normal Skin             | W1: IFA + P            | 0.417136626 | ns  |
| PD1    | Normal Skin             | W3 SSV: IFA + P        | 2.19E-05    | *** |
| PD1    | Normal Skin             | W3 RV: IFA + P         | 0.892728444 | ns  |
| PD1    | W3 SSV: IFA + P         | W3 RV: IFA + P         | 5.70E-06    | *** |
| PD1    | W1: IFA + P             | W3 RV: IFA + P         | 0.951552029 | ns  |
| PD1    | Normal Skin             | W3 RV: IFA + piCLC + P | 0.047816078 | *   |
| PD1    | W1: IFA + piCLC + P     | W3 RV: IFA + piCLC + P | 0.951552029 | ns  |
| PD1    | W3 SSV: IFA + piCLC + P | W3 RV: IFA + piCLC + P | 0.439701177 | ns  |
| LAG3   | Normal Skin             | W1: IFA + P            | 0.378958845 | ns  |
| LAG3   | Normal Skin             | W3 SSV: IFA + P        | 0.00016211  | *** |
| LAG3   | Normal Skin             | W3 RV: IFA + P         | 0.795940658 | ns  |
| LAG3   | W3 SSV: IFA + P         | W3 RV: IFA + P         | 0.001018373 | **  |
| LAG3   | W1: IFA + P             | W3 RV: IFA + P         | 0.910136267 | ns  |
| LAG3   | Normal Skin             | W3 RV: IFA + piCLC + P | 0.005443709 | **  |
| LAG3   | W1: IFA + piCLC + P     | W3 RV: IFA + piCLC + P | 0.910136267 | ns  |
| LAG3   | W3 SSV: IFA + piCLC + P | W3 RV: IFA + piCLC + P | 0.363870747 | ns  |
| TIM-3  | Normal Skin             | W1: IFA + P            | 0.296067639 | ns  |
| TIM-3  | Normal Skin             | W3 SSV: IFA + P        | 0.000449181 | *** |
| TIM-3  | Normal Skin             | W3 RV: IFA + P         | 0.755142808 | ns  |
| TIM-3  | W3 SSV: IFA + P         | W3 RV: IFA + P         | 2.98E-05    | *** |
| TIM-3  | W1: IFA + P             | W3 RV: IFA + P         | 0.958873477 | ns  |
| TIM-3  | Normal Skin             | W3 RV: IFA + piCLC + P | 0.282087544 | ns  |
| TIM-3  | W1: IFA + piCLC + P     | W3 RV: IFA + piCLC + P | 0.958873477 | ns  |
| TIM-3  | W3 SSV: IFA + piCLC + P | W3 RV: IFA + piCLC + P | 0.187346139 | ns  |
| TICAM1 | Normal Skin             | W1: IFA + P            | 0.795634732 | ns  |
| TICAM1 | Normal Skin             | W3 SSV: IFA + P        | 0.033886014 | *   |
| TICAM1 | Normal Skin             | W3 RV: IFA + P         | 0.710255573 | ns  |
| TICAM1 | W3 SSV: IFA + P         | W3 RV: IFA + P         | 0.147425086 | ns  |
| TICAM1 | W1: IFA + P             | W3 RV: IFA + P         | 0.894014538 | ns  |
| TICAM1 | Normal Skin             | W3 RV: IFA + piCLC + P | 0.720759063 | ns  |
| TICAM1 | W1: IFA + piCLC + P     | W3 RV: IFA + piCLC + P | 0.894014538 | ns  |
| TICAM1 | W3 SSV: IFA + piCLC + P | W3 RV: IFA + piCLC + P | 0.00393303  | **  |
| MYD88  | Normal Skin             | W1: IFA + P            | 0.324666971 | ns  |
| MYD88  | Normal Skin             | W3 SSV: IFA + P        | 0.000379406 | *** |
| MYD88  | Normal Skin             | W3 RV: IFA + P         | 0.712236078 | ns  |
| MYD88  | W3 SSV: IFA + P         | W3 RV: IFA + P         | 0.004206942 | **  |
| MYD88  | W1: IFA + P             | W3 RV: IFA + P         | 0.899929076 | ns  |
| MYD88  | Normal Skin             | W3 RV: IFA + piCLC + P | 0.190065818 | ns  |
| MYD88  | W1: IFA + piCLC + P     | W3 RV: IFA + piCLC + P | 0.899929076 | ns  |
| MYD88  | W3 SSV: IFA + piCLC + P | W3 RV: IFA + piCLC + P | 0.042742622 | *   |
| ARG1   | Normal Skin             | W1: IFA + P            | 0.748130031 | ns  |
| ARG1   | Normal Skin             | W3 SSV: IFA + P        | 0.589485331 | ns  |
| ARG1   | Normal Skin             | W3 RV: IFA + P         | 0.391870798 | ns  |
| ARG1   | W3 SSV: IFA + P         | W3 RV: IFA + P         | 0.033776356 | *   |
| ARG1   | W1: IFA + P             | W3 RV: IFA + P         | 0.99247624  | ns  |
| ARG1   | Normal Skin             | W3 RV: IFA + piCLC + P | 0.590473867 | ns  |
| ARG1   | W1: IFA + piCLC + P     | W3 RV: IFA + piCLC + P | 0.99247624  | ns  |
| ARG1   | W3 SSV: IFA + piCLC + P | W3 RV: IFA + piCLC + P | 0.107934272 | ns  |

## **SUPPLEMENTARY METHODS**

### Clinical Trial Methods

**Mel 48:** For Mel48, participants were immunized with MELITAC 12.1 (100µg of each of 12 melanoma peptides recognized by CD8 T cells (12MP) + 200µg of tetanus toxoid helper peptide (Tet))<sup>1</sup> emulsified in IFA (Montanide ISA-51 VG, Seppic) in one skin site on days 1, 8, 15, 29, 36, and 43. An additional sequence of vaccines were administered at one site on a different extremity to induce a similar VSME, solely for the purpose of VSME biopsies.

Participants were randomized to have the VSME biopsies a week after 1 or more vaccines. These “replicate” vaccines contained either IFA only (group 1) or IFA + MELITAC 12.1 (group 2). The replicate vaccines were administered until the date of the VSME biopsy. For the present study, VSME biopsies of the replicate site were obtained one week after the first vaccine (week 1, groups 1B/2B) or one week after the third vaccine (week 3, groups 1C/2C). Vaccine sites were marked using felt-tip pen in order to identify them at subsequent weeks for same-site vaccination. Normal skin controls were obtained pre-treatment for a subset of patients. Details of these methods have been reported.<sup>2</sup>

**Mel 58:** For the Mel58 trial, participants were also vaccinated with MELITAC12.1, and for the samples used in this analysis, the adjuvant preparation consisted of the TLR agonist polyI:CLC (pI:CLC, Hiltonol, Oncovir, Washington, DC, USA) emulsified with IFA, all collected one week after the first vaccine (week 1, groups 2B/2C). Details of these methods have been reported.<sup>3</sup>

**Mel 60:** On the Mel60 trial, participants were immunized with 7 long melanoma peptides (29-31 amino acids each), each containing a minimal epitope for CD8 T cells (LPV7<sup>4</sup>) (300µg per dose), with or without Tet helper peptide (200 µg per dose) with IFA and/or pI:CLC. The study included 7 adjuvant combinations: those analyzed for the present study included peptides with IFA alone or IFA + pI:CLC. Participants were vaccinated on days 1, 8, 15, 36, 57, and 78, at different extremity skin sites for each vaccine (rotating-site vaccines, RV) for groups A (IFA + LPV7+Tet) and E (IFA + pI:CLC+LPV7+Tet) or at the same site each week (same-site vaccination, SSV) for group E2 (IFA + pI:CLC+LPV7+Tet) For the present analysis, vaccine-site biopsy specimens were obtained one week after vaccine 1 (day 8, week 1) or one week after vaccine 3 (day 22, week 3) after RV or SSV. Biopsies on week 3 were taken at the site of the most recent vaccine.

**Mel 63:** On the Mel63 trial, participants were immunized with 6 Class II MHC restricted melanoma peptides (6MHP)<sup>5,6</sup> emulsified either in IFA alone or in IFA + pI:CLC, with vaccines injected in the same extremity skin site (SSV) on days 1, 8, and 15. Punch biopsy specimens from 1 week after the first vaccine (week 1) and 1 week after the third vaccine (week 3) were used in the present analysis.

#### Tissue collection, RNA processing, and library preparation

RNA was extracted from the RNeasy stored samples as previously described,<sup>7</sup> using the RNeasy Lipid Tissue MiniKit (Qiagen, Germantown, MD, USA) according to the manufacturer's specifications. The RNA was processed for library prep as previously described.<sup>7</sup> The UVA School of Medicine's Genome Analysis and Technology Core (GATC) performed the library preparation and final purified libraries underwent quantification and sizing using the Invitrogen

Qubit 3 Fluorometer (ThermoFisher Scientific Inc., Waltham, MA) and Agilent Technologies 4200 TapeStation (Agilent Technologies Inc., Santa Clara, CA)

### Statistical Analysis

The count table was imported to R for differential gene expression analysis. Low expressed genes (genes expressed only in few samples with low counts) were excluded from the analysis before identifying differentially expressed genes. Data normalization, dispersion estimates and fitting of a negative binomial model were carried out with the DESeq2 Bioconductor package.<sup>8</sup> The variance stabilized transformed normalized gene expression of the 500 most variable genes was used to perform a principal component analysis. The Benjamini-Hochberg False Discovery Rate (FDR) procedure was used to re-estimate the adjusted p-values. FDR-corrected p-values (FDR-p) <0.05 were considered significant.

Gene set enrichment analysis (GSEA) was performed to identify enriched biological pathways using the *clusterProfiler* package in R.<sup>9</sup> Genes were ranked according to the Log2 fold-change in expression. Kyoto Encyclopedia of Genes and Genomes<sup>10</sup> gene sets (KEGG) were imported from the Molecular Signatures Database<sup>11</sup> (MSigDB) and a custom tertiary lymphoid structure (TLS) gene set was created comprised of previously described TLS-associated genes.<sup>12</sup>

### Example count matrix and code. Code shown in blue

Count Matrix (first four columns and subset of genes shown)

| ## Gene     | Samp1 | Samp2 | Samp3 | Samp4 |
|-------------|-------|-------|-------|-------|
| ## TSPAN6   | 618   | 476   | 1588  | 321   |
| ## TNMD     | 168   | 89    | 404   | 14    |
| ## DPM1     | 828   | 941   | 814   | 897   |
| ## SCYL3    | 529   | 564   | 546   | 440   |
| ## C1orf112 | 155   | 189   | 112   | 144   |
| ## FGR      | 3346  | 2449  | 268   | 5802  |

### DESeq2 Data Matrix for Differential Gene Expression analysis

```
# Creating DESeq dataset (dds)
library(DESeq2)
dds <- DESeqDataSetFromMatrix(count_matrix, new.metadata, ~Conditions)

# Count filtration
idx <- rowSums( counts(dds) >= 5 ) >= 10
dds <- dds[idx,]

# Setting the baseline comparison and DESeq execution
dds$Conditions <- relevel(dds$Conditions, "Cont")
dds <- DESeq(dds)

# Variance Stabilizing Transformation of the count matrix
rld <- vst(dds, blind = FALSE)
```

Note: For IFA vs IFA+Peptide analysis: DESeq2 performed as above but only including IFA and IFA+Peptide conditions.

PCA of vst transformed counts was performed using *prcomp*

```
pca <- prcomp(t(assay(rld)), center = TRUE)
scores <- as.data.frame(pca$x)
PC1 <- scores$PC1
PC2 <- scores$PC2
PC3 <- scores$PC3
PC4 <- scores$PC4
```

# PC1 vs PC2 and PC3 vs PC4 were then plotted using *ggplot2*.

GSEA Analysis

# *geneList* is a list with Log2Fold change and Gene Name for GSEA which was generated by # DESeq2. This was the comparison of IFA alone and IFA + P.

```
library(clusterProfiler)
library(msigdbr)
```

# Downloading KEGG sets from *msigdb*

```
m_t2g <- msigdbr(species = "Homo sapiens", category = "C2", subcategory = "CP:KEGG") %>%
dplyr::select(gs_name, entrez_gene)
```

# Sort gene list by Log2FoldChange for GSEA and run GSEA

```
geneList <- sort(geneList, decreasing=TRUE)
em <- GSEA(geneList, TERM2GENE = m_t2g, pvalueCutoff = 0.05, verbose = FALSE)
```

# Plot GSEA results by pathway. This example code shows the generation of the GSEA plot of the most highly enriched set.

```
library(enrichplot)
gseaplot2(em, geneSetID = 1, title = em$Description[1], color = "green")
```

## REFERENCES

1. Slingluff CL, Jr., Yamshchikov G, Neese P, et al. Phase I trial of a melanoma vaccine with gp100(280-288) peptide and tetanus helper peptide in adjuvant: immunologic and clinical outcomes. *Clin Cancer Res* 2001;7(10):3012-24. [published Online First: 2001/10/12]
2. Salerno EP, Shea SM, Olson WC, et al. Activation, dysfunction and retention of T cells in vaccine sites after injection of incomplete Freund's adjuvant, with or without peptide. *Cancer Immunol Immunother* 2013;62(7):1149-59. doi: 10.1007/s00262-013-1435-5 [published Online First: 2013/05/10]

3. Melssen M, Petroni G, Grosh W, et al. A multi-peptide vaccine plus toll-like receptor (TLR) agonists LPS or poly(I:CLC) in combination with incomplete Freund's adjuvant (IFA) in melanoma patients. 31st Annual Meeting and Associated Programs of the Society for Immunotherapy of Cancer (SITC 2016). National Harbor, MD, 2016:Poster 352.
4. Patel SP, Petroni GR, Gaughan EM, et al. Phase I/II trial of a long peptide vaccine (LPV7) plus toll-like receptor (TLR) agonists for resected stage IIB-IV melanoma. *Journal of Clinical Oncology* 2018;36(15\_suppl):e15171-e71. doi: 10.1200/JCO.2018.36.15\_suppl.e15171
5. Slingluff CL, Jr., Petroni GR, Olson W, et al. Helper T cell responses and clinical activity of a melanoma vaccine with multiple peptides from MAGE and melanocytic differentiation antigens. *Journal of Clinical Oncology* 2008;26(30):4973-80. doi: 10.1200/JCO.2008.17.3161
6. Slingluff CL, Jr., Petroni GR, Chianese-Bullock KA, et al. Trial to evaluate the immunogenicity and safety of a melanoma helper peptide vaccine plus incomplete Freund's adjuvant, cyclophosphamide, and poly(I:CLC) (Mel63). *J Immunother Cancer* 2021;9(1) doi: 10.1136/jitc-2020-000934 [published Online First: 2021/01/23]
7. Pollack KE, Meneveau MO, Melssen MM, et al. Incomplete Freund's adjuvant reduces arginase and enhances Th1 dominance, TLR signaling and CD40 ligand expression in the vaccine site microenvironment. *J Immunother Cancer* 2020;8(1) doi: 10.1136/jitc-2020-000544 [published Online First: 2020/05/01]
8. Love MI, Huber W, Anders S. Moderated estimation of fold change and dispersion for RNA-seq data with DESeq2. *Genome Biol* 2014;15(12):550. doi: 10.1186/s13059-014-0550-8 [published Online First: 2014/12/18]
9. Subramanian A, Tamayo P, Mootha VK, et al. Gene set enrichment analysis: A knowledge-based approach for interpreting genome-wide expression profiles. *Proceedings of the National Academy of Sciences* 2005;102(43):15545-50. doi: 10.1073/pnas.0506580102
10. Kanehisa M, Goto S. KEGG: kyoto encyclopedia of genes and genomes. *Nucleic Acids Res* 2000;28(1):27-30. doi: 10.1093/nar/28.1.27 [published Online First: 1999/12/11]
11. Liberzon A, Subramanian A, Pinchback R, et al. Molecular signatures database (MSigDB) 3.0. *Bioinformatics* 2011;27(12):1739-40. doi: 10.1093/bioinformatics/btr260
12. Melssen MM, Pollack KE, Meneveau MO, et al. Characterization and comparison of innate and adaptive immune responses at vaccine sites in melanoma vaccine clinical trials. *Cancer Immunology, Immunotherapy* 2021 doi: 10.1007/s00262-020-02844-w
13. Behrends S, Vehse K. The  $\beta 2$  Subunit of Soluble Guanylyl Cyclase Contains a Human-Specific Frameshift and Is Expressed in Gastric Carcinoma. *Biochemical and Biophysical Research Communications* 2000;271(1):64-69. doi: <https://doi.org/10.1006/bbrc.2000.2596>
14. Covino DA, Gauzzi MC, Fantuzzi L. Understanding the regulation of APOBEC3 expression: Current evidence and much to learn. *Journal of Leukocyte Biology* 2018;103(3):433-44. doi: <https://doi.org/10.1002/JLB.2MR0717-310R>
15. Ho M-F, Lummertz da Rocha E, Zhang C, et al. TCL1A, a novel transcription factor and a co-regulator of NF- $\kappa$ B p65: SNP and estrogen-dependence. *Journal of Pharmacology and Experimental Therapeutics* 2018;jpet.118.247718. doi: 10.1124/jpet.118.247718
16. Mandal S, Curtis L, Pind M, et al. S100A7 (psoriasin) influences immune response genes in human breast cancer. *Experimental Cell Research* 2007;313(14):3016-25. doi: <https://doi.org/10.1016/j.yexcr.2007.03.020>
17. Bots M, Medema JP. Serpins in T cell immunity. *Journal of Leukocyte Biology* 2008;84(5):1238-47. doi: <https://doi.org/10.1189/jlb.0208140>
18. Rajagopalan S, Moyle MW, Joosten I, et al. DNA-PKcs controls an endosomal signaling pathway for a proinflammatory response by natural killer cells. *Sci Signal* 2010;3(110):ra14. doi: 10.1126/scisignal.2000467 [published Online First: 2010/02/25]
19. Liu M, Guo S, Stiles JK. The emerging role of CXCL10 in cancer (Review). *Oncol Lett* 2011;2(4):583-89. doi: 10.3892/ol.2011.300 [published Online First: 2012/08/01]
20. Kyoreva M, Li Y, Hoosenally M, et al. CYP1A1 Enzymatic Activity Influences Skin Inflammation Via Regulation of the AHR Pathway. *Journal of Investigative Dermatology* 2020 doi: <https://doi.org/10.1016/j.jid.2020.11.024>
21. Schotte R, Risoan MC, Bendriss-Vermare N, et al. The transcription factor Spi-B is expressed in plasmacytoid DC precursors and inhibits T-, B-, and NK-cell development. *Blood* 2003;101(3):1015-23. doi: 10.1182/blood-2002-02-0438 [published Online First: 2002/10/24]

22. Lyu L, Yao J, Wang M, et al. Overexpressed Pseudogene HLA-DPB2 Promotes Tumor Immune Infiltrates by Regulating HLA-DPB1 and Indicates a Better Prognosis in Breast Cancer. *Frontiers in Oncology* 2020;10(1245) doi: 10.3389/fonc.2020.01245
23. Wikenheiser DJ, Stumhofer JS. ICOS Co-Stimulation: Friend or Foe? *Front Immunol* 2016;7(304) doi: 10.3389/fimmu.2016.00304
24. Kubach J, Lutter P, Bopp T, et al. Human CD4+CD25+ regulatory T cells: proteome analysis identifies galectin-10 as a novel marker essential for their anergy and suppressive function. *Blood* 2007;110(5):1550-58. doi: 10.1182/blood-2007-01-069229
25. Sawant KV, Poluri KM, Dutta AK, et al. Chemokine CXCL1 mediated neutrophil recruitment: Role of glycosaminoglycan interactions. *Scientific Reports* 2016;6(1):33123. doi: 10.1038/srep33123
26. Mayer WE, O'HUigin C, Klein J. Resolution of the HLA-DRB6 puzzle: a case of grafting a de novo-generated exon on an existing gene. *Proc Natl Acad Sci U S A* 1993;90(22):10720-4. doi: 10.1073/pnas.90.22.10720 [published Online First: 1993/11/15]
27. Davis AP, Capecchi MR. Axial homeosis and appendicular skeleton defects in mice with a targeted disruption of *hoxd-11*. *Development* 1994;120(8):2187-98. [published Online First: 1994/08/01]
28. Oganessian A, Poot M, Daum G, et al. Protein tyrosine phosphatase RQ is a phosphatidylinositol phosphatase that can regulate cell survival and proliferation. *Proceedings of the National Academy of Sciences* 2003;100(13):7563-68. doi: 10.1073/pnas.1336511100
29. Zhu Y, Kakinuma N, Wang Y, et al. Kank proteins: a new family of ankyrin-repeat domain-containing proteins. *Biochim Biophys Acta* 2008;1780(2):128-33. doi: 10.1016/j.bbagen.2007.09.017 [published Online First: 2007/11/13]
30. Duda P, Janczara J, McCubrey JA, et al. The Reverse Warburg Effect Is Associated with Fbp2-Dependent Hif1 $\alpha$  Regulation in Cancer Cells Stimulated by Fibroblasts. *Cells* 2020;9(1):205.
